# Supplementary material for: Autoimmune and Autoinflammatory Connective Tissue Disorders Following COVID-19
Source: PubMed Central journal article supplement (PMC10559181; doi:10.1001/jamanetworkopen.2023.36120), 2023-10-06
Supplement: jamanetwopen-e2336120-s001.pdf [file jamanetwopen-e2336120-s001.pdf]

## Supplemental Online Content

Lim SH, Ju HJ, Han JH, et al. Autoimmune and autoinflammatory connective tissue disorders following COVID-19. *JAMA Netw Open*. 2023;6(10):e2336120.  
doi:10.1001/jamanetworkopen.2023.36120

**eTable 1.** *International Statistical Classification of Diseases, Tenth Revision (ICD-10) Codes of the Included Diseases*

**eMethods.** The Predefined Covariates for Inverse Probability Weighting

**eFigure 1.** Cumulative Incidence Plot for All-Cause Mortality Among Patients With Covid-19 and Controls

**eFigure 2.** Covariate Balance After Application of Inverse Probability Weighting

**eFigure 3.** Cumulative Incidences of Autoinflammatory and Autoimmune Connective Tissue Disorders Outcomes

**eTable 2.** Sensitivity Analysis: Demographic and Clinical Characteristics of Individuals Who Underwent and Who Did Not Undergo General Health Examination

**eTable 3.** Sensitivity Analysis: Demographic and Clinical Characteristics of Individuals Who Survived at Least 60 Days Post COVID-19 Diagnosis and Controls Before And After Weighting

**eFigure 4.** Sensitivity Analyses: Risks Of Incident Autoimmune and Autoinflammatory Disease Outcomes in Individuals Survived by 60 Days Post–COVID-19 Diagnosis and the Controls

**eFigure 5.** Sensitivity Analysis: Risks of Incident Autoimmune and Autoinflammatory Disease Outcomes in COVID-19 Cohort and the Control Cohort, Adjusted for Area of Residency (Urban vs Rural) Status Only

This supplemental material has been provided by the authors to give readers additional information about their work.

**eTable 1. International Statistical Classification of Diseases, tenth revision (ICD-10) codes of the included diseases**

| Disease                                                    | ICD-10 code             |
|------------------------------------------------------------|-------------------------|
| <b>Autoimmune and autoinflammatory outcomes</b>            |                         |
| Alopecia areata                                            | L63                     |
| Alopecia totalis                                           | L630, L631              |
| Psoriasis                                                  | L40                     |
| Vitiligo                                                   | L80                     |
| Anti-neutrophil cytoplasmic antibody-associated vasculitis | M301, M313, M317, M318  |
| Behcet disease                                             | M352                    |
| Crohn disease                                              | K50                     |
| Ulcerative colitis                                         | K51                     |
| Rheumatoid arthritis                                       | M05, M06, M08           |
| Adult-onset Still disease                                  | M061                    |
| Polymyositis                                               | M332                    |
| Systemic lupus erythematosus                               | M32                     |
| Systemic sclerosis                                         | M34                     |
| Sjogren syndrome                                           | M350                    |
| Ankylosing spondylitis                                     | M45                     |
| Sarcoidosis                                                | D86                     |
| <b>Positive control outcomes</b>                           |                         |
| Myocardial infarction                                      | I21                     |
| Congestive heart failure                                   | I50                     |
| Stroke                                                     | I60, I61, I62, I63      |
| <b>Negative control outcomes</b>                           |                         |
| Epidermal cyst                                             | L720                    |
| Tympanic membrane perforation                              | H72                     |
| Trauma of multiple site                                    | T00                     |
| <b>Chronic diseases that served as the covariates</b>      |                         |
| Hypertension                                               | I10                     |
| Diabetes mellitus                                          | E08, E09, E10, E11, E13 |
| Dyslipidemia                                               | E78                     |
| Chronic obstructive pulmonary disease                      | J44                     |
| Chronic kidney disease                                     | N18                     |
| Mild liver disease                                         | K73, K18                |
| Atopic dermatitis                                          | L20                     |
| Allergic rhinitis                                          | J30                     |
| Asthma                                                     | J45                     |
| Hepatitis B virus infection                                | B180, B181, B191        |
| Hepatitis C virus infection                                | B182, B192              |
| Human immunodeficiency virus infection                     | B20                     |

**eMethods.** The predefined covariates for inverse probability weighting

Age at the study index date, sex, income level, insurance type, area of residence, height, weight, body mass index, waist circumference, smoking status, average number of healthcare encounters per year, systolic blood pressure, diastolic blood pressure, serum levels of hemoglobin, fasting blood glucose, liver enzyme levels (aspartate aminotransferase, alanine transaminase, gamma-glutamyl transferase), and creatinine, COVID-19 vaccination status (more than one time vs. none) at index date, and personal histories of hypertension, diabetes mellitus, dyslipidemia, chronic obstructive pulmonary disease, chronic kidney disease, mild liver disease, atopic dermatitis, allergic rhinitis, asthma, hepatitis B and C infection, and human immunodeficiency virus infection.

**eFigure 1. Cumulative incidence plot for all-cause mortality among patients with COVID-19 and controls**

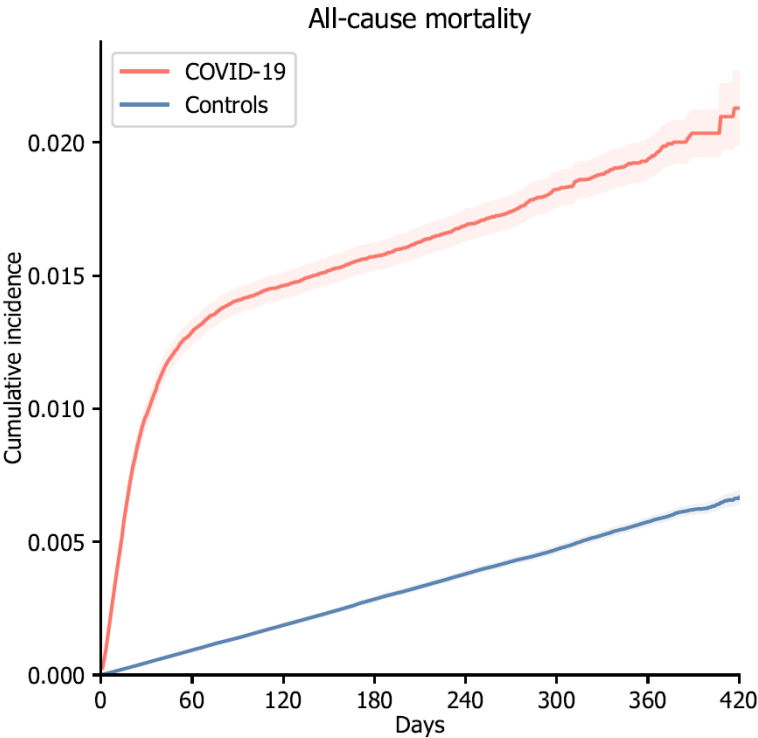

**eFigure 2. Covariate balance after application of inverse probability weighting**

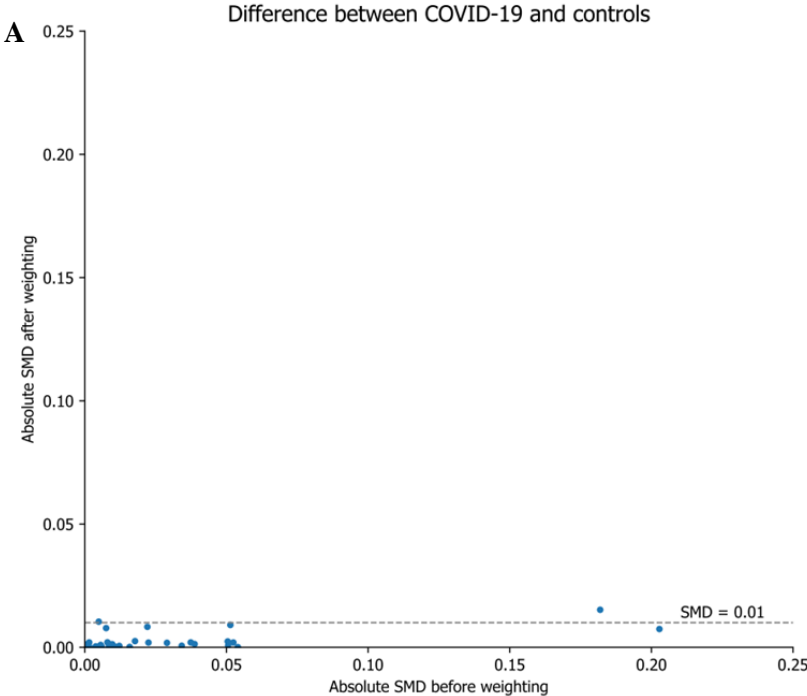

SMDs between individuals with COVID-19 and controls. Abbreviations: COVID-19, Coronavirus 2019; SMD, standardized mean difference.

**eFigure 3. Cumulative incidences of autoinflammatory and autoimmune connective tissue disorders outcomes**

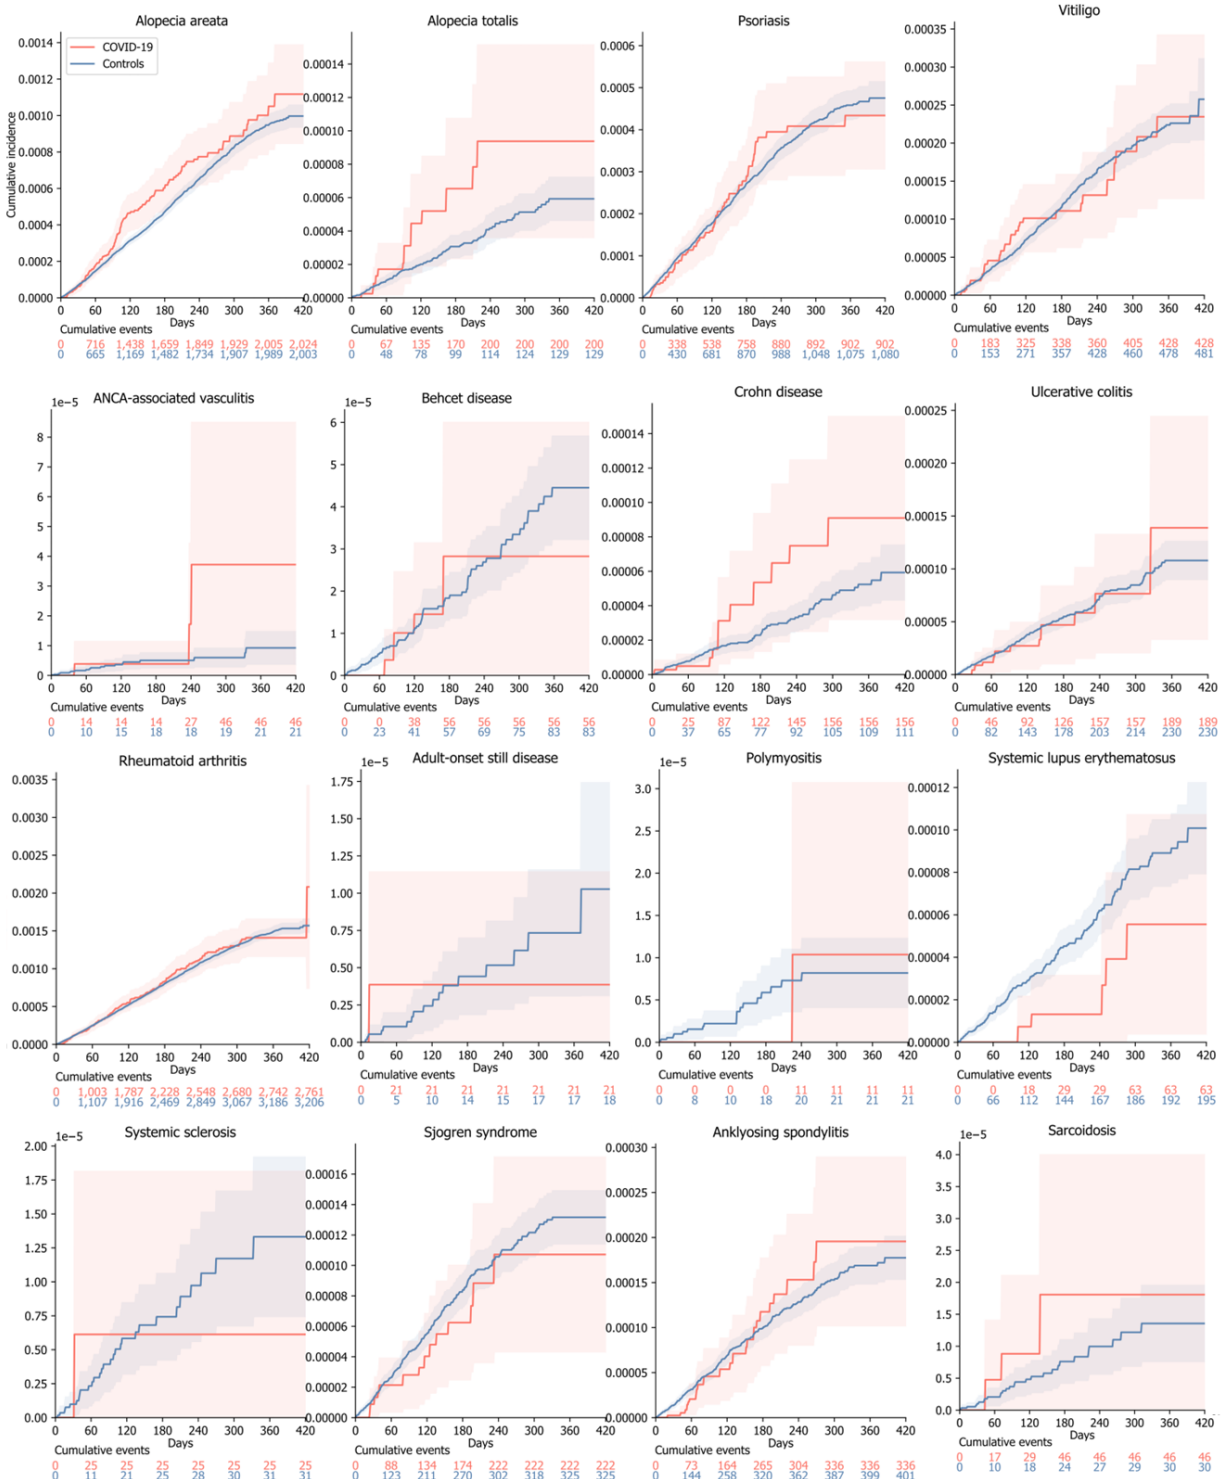

ANCA, anti-neutrophil cytoplasmic antibody

**eTable 2. Sensitivity analysis: Demographic and clinical characteristics of individuals who underwent and who did not undergo general health examination**

|                                                         | Individuals who had GE<br>(N=6,482,630) | Individuals who did not undergo GE<br>(N=3,935,099) |
|---------------------------------------------------------|-----------------------------------------|-----------------------------------------------------|
| <b>Age, mean ± SD, y</b>                                | 52.04±15.61                             | 24.76±19.02                                         |
| ≥40                                                     | 4,875,146(75.2)                         | 735,269(18.68)                                      |
| 18–39                                                   | 1,607,460(24.8)                         | 1,477,043(37.54)                                    |
| <18                                                     | 24(0.00)                                | 1,722,787(43.78)                                    |
| <b>Female sex, n (%)</b>                                | 3,250,599(50.14)                        | 1,794,011(45.59)                                    |
| <b>Insurance type, n (%)</b>                            |                                         |                                                     |
| Standard                                                | 6,260,919(96.58)                        | 3,744,567(95.16)                                    |
| Medicaid                                                | 221,711(3.42)                           | 190,532(4.84)                                       |
| <b>Income level, n (%)</b>                              |                                         |                                                     |
| Highest                                                 | 1,936,598(29.87)                        | 1,333,489(33.89)                                    |
| Higher                                                  | 1,863,693(28.75)                        | 1,109,109(28.19)                                    |
| Lower                                                   | 1,633,174(25.19)                        | 832,628(21.16)                                      |
| Lowest                                                  | 1,013,520(15.63)                        | 622,140(15.81)                                      |
| <b>No. of healthcare encounters per year, mean ± SD</b> | 15.06±16.73                             | 11.08±11.76                                         |
| <b>COVID-19 positivity</b>                              | 354,527(5.47)                           | 225,430(5.73)                                       |
| <b>COVID-19 vaccination status, n (%)</b>               |                                         |                                                     |
| Vaccinated at least 1 time                              | 4,253,039(65.61)                        | 1,304,263(33.14)                                    |
| Non-vaccinated                                          | 2,229,591(34.39)                        | 2,630,836(66.86)                                    |
| <b>Underlying disease, n (%)</b>                        |                                         |                                                     |
| Hypertension                                            | 1,862,600(28.73)                        | 252,363(6.41)                                       |
| Diabetes mellitus                                       | 1,025,359(15.82)                        | 137,762(3.50)                                       |
| Dyslipidemia                                            | 2,504,551(38.63)                        | 312,785(7.95)                                       |
| Chronic obstructive pulmonary disease                   | 99,476(1.53)                            | 16,546(0.42)                                        |
| Chronic kidney disease                                  | 72,701(1.12)                            | 16,687(0.42)                                        |
| Liver disease                                           | 179,135(2.76)                           | 22,366(0.57)                                        |
| Atopic dermatitis                                       | 72,465(1.12)                            | 152,449(3.87)                                       |
| Allergic rhinitis                                       | 315,292(4.86)                           | 289,582(7.36)                                       |
| Asthma                                                  | 144,695(2.23)                           | 134,343(3.41)                                       |
| Hepatitis B                                             | 130,414(2.01)                           | 14,075(0.36)                                        |
| Hepatitis C                                             | 20,083(0.31)                            | 2,957(0.08)                                         |
| HIV infection                                           | 292(0.00)                               | 148(0.00)                                           |

Abbreviations: GE, general health examination; HIV, human immunodeficiency virus

**eTable 3. Sensitivity analysis: Demographic and clinical characteristics of individuals who survived at least 60 days post COVID-19 diagnosis and controls before and after weighting**

|                                                       | Pre-weighting            |                           |                                        | Post-weighting  |                |                                        |
|-------------------------------------------------------|--------------------------|---------------------------|----------------------------------------|-----------------|----------------|----------------------------------------|
|                                                       | COVID-19<br>(N= 192,854) | Control<br>(N= 3,372,056) | Absolute<br>standardized<br>difference | COVID-19<br>(%) | Control<br>(%) | Absolute<br>standardized<br>difference |
| Age, mean ± SD, y                                     | 49.89 ± 15.00            | 52.06 ± 15.62             | 0.1423                                 | 51.63 ± 65.58   | 51.85 ± 15.98  | 0.0143                                 |
| Female sex, n (%)                                     | 95,023 (49.27)           | 1,692,429 (50.19)         | 0.0188                                 | (49.87)         | (50.16)        | 0.0059                                 |
| Insurance type, n (%)                                 |                          |                           | 0.0039                                 |                 |                | 0.0000                                 |
| Standard                                              | 186,574 (96.74)          | 3,256,561 (96.57)         |                                        | (97.26)         | (97.08)        |                                        |
| Medicaid                                              | 6,280 (3.26)             | 115,495 (3.43)            |                                        | (2.74)          | (2.92)         |                                        |
| Income level, n (%)                                   |                          |                           | 0.0471                                 |                 |                | 0.0080                                 |
| Highest                                               | 53,512 (27.75)           | 1,009,728 (29.94)         |                                        | (28.52)         | (30.24)        |                                        |
| Higher                                                | 55,418 (28.74)           | 969,975 (28.77)           |                                        | (29.58)         | (29.06)        |                                        |
| Lower                                                 | 52,930 (27.45)           | 848,159 (25.15)           |                                        | (27.32)         | (25.42)        |                                        |
| Lowest                                                | 30,300 (15.71)           | 525,457 (15.58)           |                                        | (14.58)         | (15.27)        |                                        |
| Area of residence, n (%)                              |                          |                           | 0.1587                                 |                 |                | 0.0116                                 |
| Urban                                                 | 101,303 (52.53)          | 1,503,271 (44.58)         |                                        | (43.24)         | (45.3)         |                                        |
| Rural                                                 | 91,551 (47.47)           | 1,868,785 (55.42)         |                                        | (56.76)         | (54.70)        |                                        |
| COVID-19 vaccination status, n (%)                    |                          |                           | 0.0547                                 |                 |                | 0.0039                                 |
| Vaccinated at least 1 time                            | 57,598 (29.87)           | 1,385,341 (41.08)         |                                        | (37.30)         | (40.48)        |                                        |
| Non-vaccinated                                        | 135,256 (70.13)          | 1,986,715 (58.92)         |                                        | (62.70)         | (59.52)        |                                        |
| <b>General health examination data,<br/>mean ± SD</b> |                          |                           |                                        |                 |                |                                        |
| Height, cm                                            | 165.00 ± 9.32            | 164.20 ± 9.36             | 0.0865                                 | 164.40 ± 39.99  | 164.30 ± 9.60  | 0.0081                                 |
| Weight, cm                                            | 66.93 ± 13.69            | 65.61 ± 13.30             | 0.0981                                 | 65.81 ± 56.32   | 65.68 ± 13.71  | 0.0092                                 |
| Body mass index, kg/m <sup>2</sup>                    | 24.44 ± 3.76             | 24.20 ± 4.09              | 0.0612                                 | 24.23 ± 15.47   | 24.21 ± 4.26   | 0.0061                                 |
| Waist circumference, cm                               | 81.81 ± 11.13            | 81.37 ± 11.66             | 0.0396                                 | 81.44 ± 45.14   | 81.37 ± 11.84  | 0.0062                                 |
| Smoking, n (%)                                        |                          |                           | 0.0130                                 |                 |                | 0.0038                                 |
| Current smoker                                        | 37,544 (19.47)           | 638,947 (18.95)           |                                        | (19.24)         | (18.98)        |                                        |
| Ex-smoker                                             | 30,759 (15.95)           | 596,142 (17.68)           |                                        | (18.95)         | (17.49)        |                                        |
| Never smoker                                          | 124,551 (64.58)          | 2,136,967 (63.37)         |                                        | (61.81)         | (63.53)        |                                        |
| Systolic blood pressure, mmHg                         | 122.40 ± 14.95           | 123.00 ± 15.04            | 0.0362                                 | 122.90 ± 64.80  | 122.90 ± 15.47 | 0.0003                                 |
| Diastolic blood pressure, mmHg                        | 75.88 ± 10.38            | 75.90 ± 10.20             | 0.0018                                 | 75.90 ± 44.30   | 75.90 ± 10.49  | 0.0002                                 |
| Hemoglobin, g/dL                                      | 14.24 ± 1.59             | 14.20 ± 1.59              | 0.0248                                 | 14.20 ± 6.77    | 14.20 ± 1.64   | 0.0035                                 |
| Fasting serum glucose, mmol/L                         | 100.90 ± 25.46           | 101.30 ± 25.22            | 0.0148                                 | 101.20 ± 109.90 | 101.30 ± 25.93 | 0.0028                                 |
| Aspartate aminotransferase, U/L                       | 26.59 ± 25.99            | 26.49 ± 24.07             | 0.0041                                 | 26.64 ± 102.00  | 26.50 ± 25.98  | 0.0055                                 |
| Alanine transaminase, U/L                             | 26.66 ± 28.42            | 26.16 ± 27.90             | 0.0177                                 | 26.50 ± 157.50  | 26.18 ± 28.71  | 0.0114                                 |
| Gamma-glutamyl transferase, U/L                       | 37.29 ± 50.67            | 36.51 ± 50.94             | 0.0159                                 | 36.68 ± 209.5   | 36.55 ± 52.58  | 0.0026                                 |
| Creatinine, mg/dL                                     | 0.86 ± 0.62              | 0.86 ± 0.53               | 0.0045                                 | 0.86 ± 2.24     | 0.86 ± 0.55    | 0.0004                                 |
| <b>Underlying disease, n (%)</b>                      |                          |                           |                                        |                 |                |                                        |
| Hypertension                                          | 50,341 (26.1)            | 959,304 (28.45)           | 0.0520                                 | (24.77)         | (28.38)        | 0.0043                                 |
| Diabetes mellitus                                     | 28,911 (14.99)           | 527,236 (15.64)           | 0.0176                                 | (13.64)         | (15.61)        | 0.0037                                 |
| Dyslipidemia                                          | 70,442 (36.53)           | 1,291,408 (38.3)          | 0.0363                                 | (34.66)         | (38.33)        | 0.0052                                 |
| Chronic obstructive pulmonary disease                 | 2,325 (1.21)             | 51,209 (1.52)             | 0.0271                                 | (1.13)          | (1.48)         | 0.0002                                 |
| Chronic kidney disease                                | 1,888 (0.98)             | 36,593 (1.09)             | 0.0110                                 | (0.82)          | (1.08)         | 0.0026                                 |
| Liver disease                                         | 5,061 (2.62)             | 91,496 (2.71)             | 0.0050                                 | (2.49)          | (2.71)         | 0.0032                                 |
| Atopic dermatitis                                     | 2,136 (1.11)             | 37,101 (1.1)              | 0.0004                                 | (1.07)          | (1.10)         | 0.0010                                 |
| Allergic rhinitis                                     | 9,531 (4.94)             | 163,240 (4.84)            | 0.0054                                 | (4.76)          | (4.86)         | 0.0007                                 |
| Asthma                                                | 4,123 (2.14)             | 74,762 (2.22)             | 0.0051                                 | (2.00)          | (2.21)         | 0.0013                                 |
| Hepatitis B                                           | 3,717 (1.93)             | 67,555 (2)                | 0.0052                                 | (1.90)          | (2.01)         | 0.0009                                 |
| Hepatitis C                                           | 651 (0.34)               | 10,349 (0.31)             | 0.0058                                 | (0.28)          | (0.31)         | 0.0017                                 |
| HIV infection                                         | 13 (0.01)                | 155 (0.0)                 | 0.0024                                 | (0.01)          | (0.00)         | 0.0006                                 |

Abbreviations, COVID-19, Coronavirus 2019; HIV, human immunodeficiency virus



**eFigure 4. Sensitivity analyses: risks of incident autoimmune and autoinflammatory disease outcomes in individuals survived by 60 days post COVID-19 diagnosis and the control cohort**

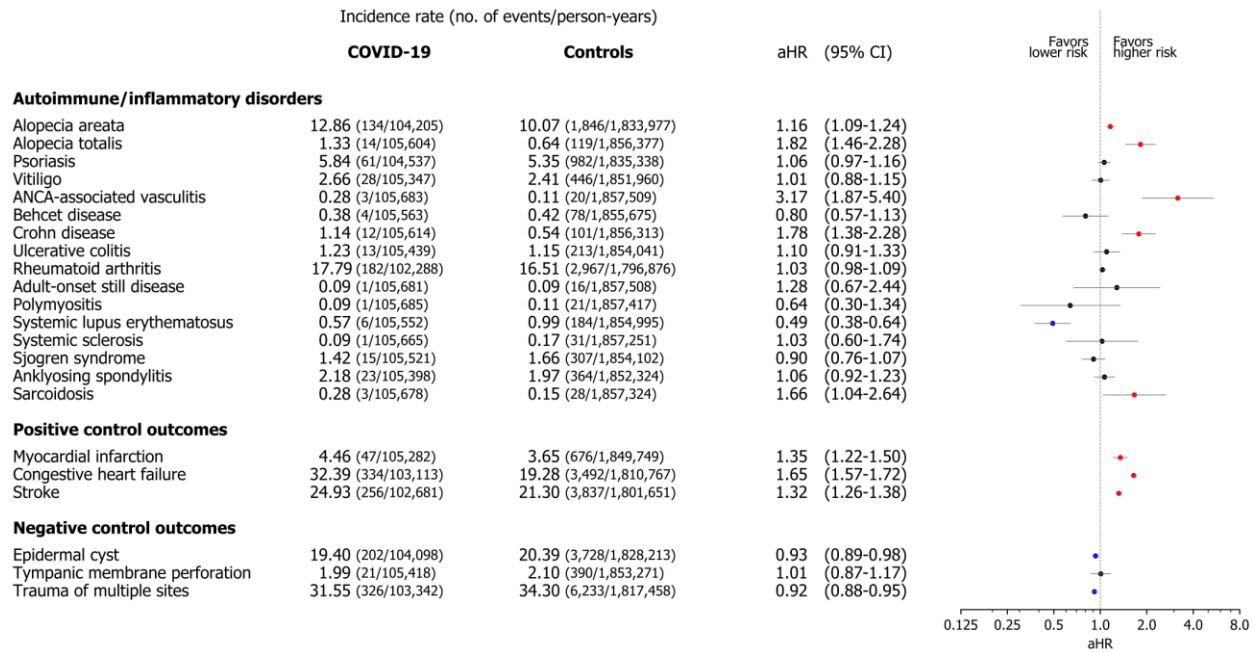

The forest plot depicts aHRs and 95% CIs in individuals with COVID-19 compared with controls. The hazard estimates were adjusted for all 32 covariates used for the inverse probability of treatment weighting. For each analysis, individuals who had already been diagnosed with the target outcome at the index date or before were excluded.

Abbreviations: COVID-19, coronavirus disease 2019; aHR, adjusted hazard ratio; CI, confidence interval.

**eFigure 5. Sensitivity analysis: risks of incident autoimmune and autoinflammatory disease outcomes in COVID-19 cohort and the control cohort, adjusted for area of residency (urban vs rural) status only**

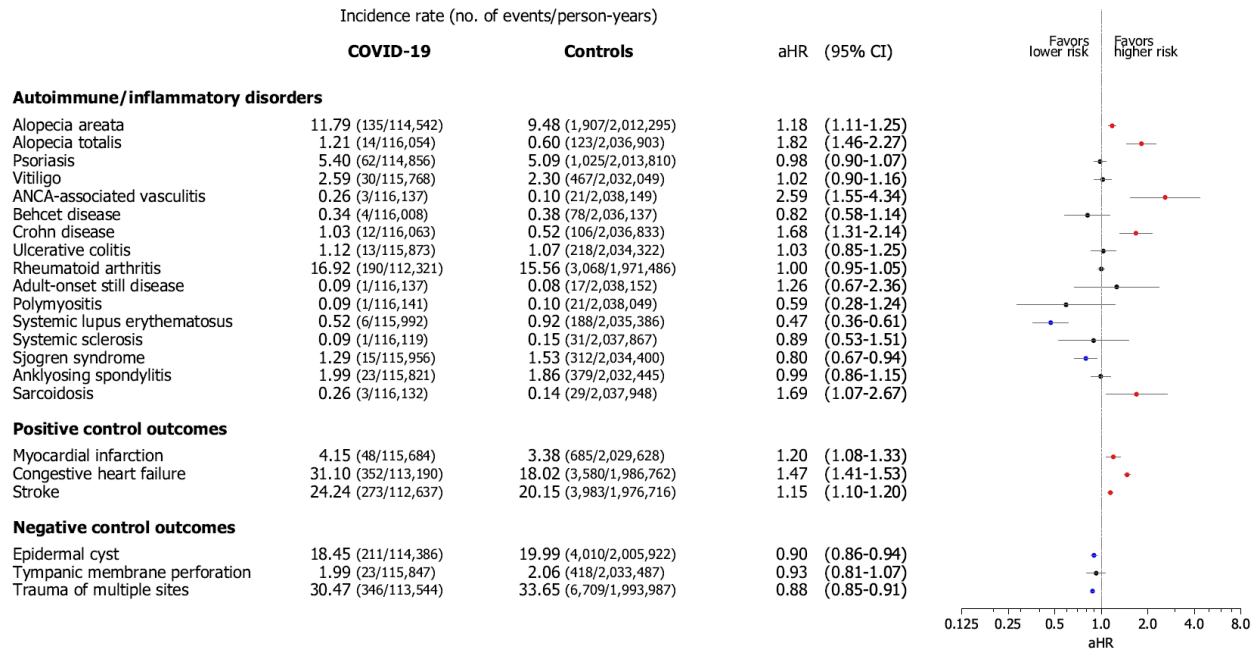

The forest plot depicts aHRs and 95% CIs in individuals with COVID-19 compared with controls. Abbreviations: COVID-19, coronavirus disease 2019; aHR, adjusted hazard ratio; CI, confidence interval.
